# Supplementary material for: Evolutionary Clues of North-South Divergence: Genomic Adaptation of the Intertidal Mudskipper Boleophthalmus pectinirostris
Source: Research Square preprint supplement (doi:10.21203/rs.3.rs-6768090/v1), 2025-06-16
Supplement: Supplementary file 1 [file e0cf40d13307333c4d667cf2.docx]

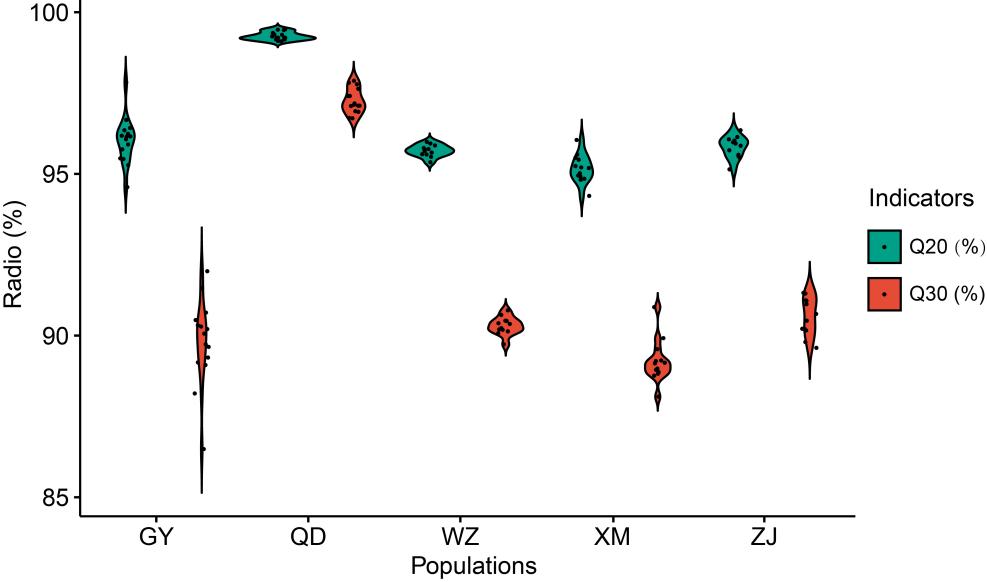


**Fig. S1** Q20 and Q30 of the clean reads


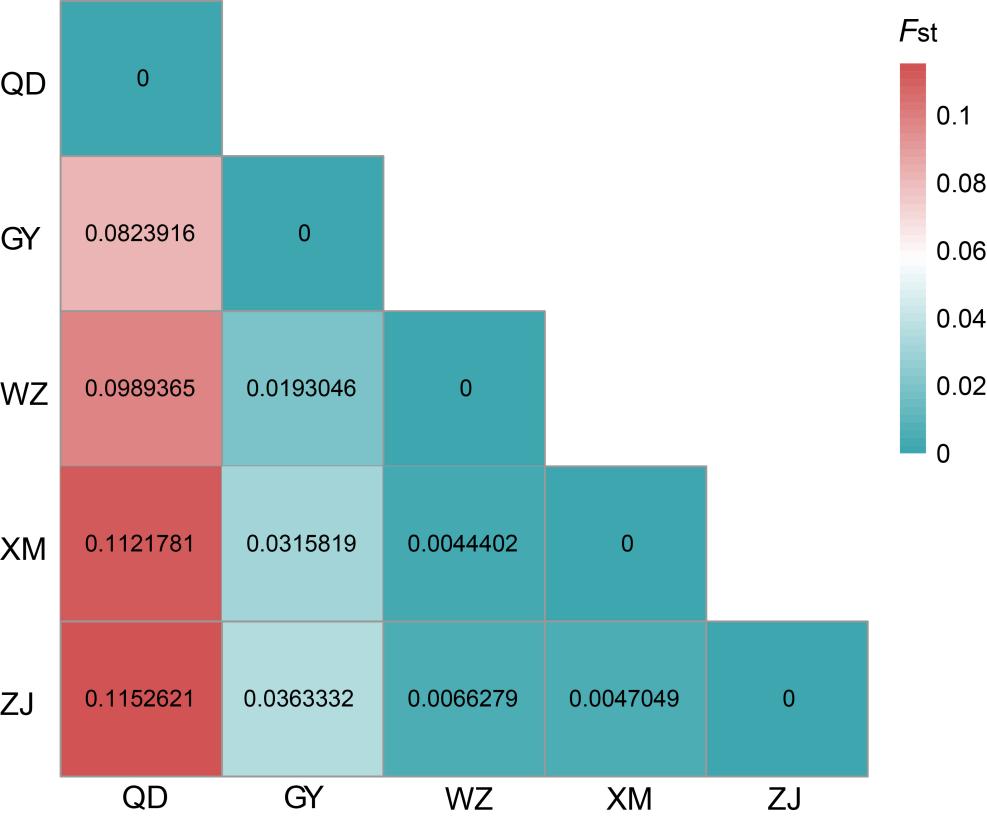


**Fig. S2** *Fst* values between five *B. pectinirostris* populations


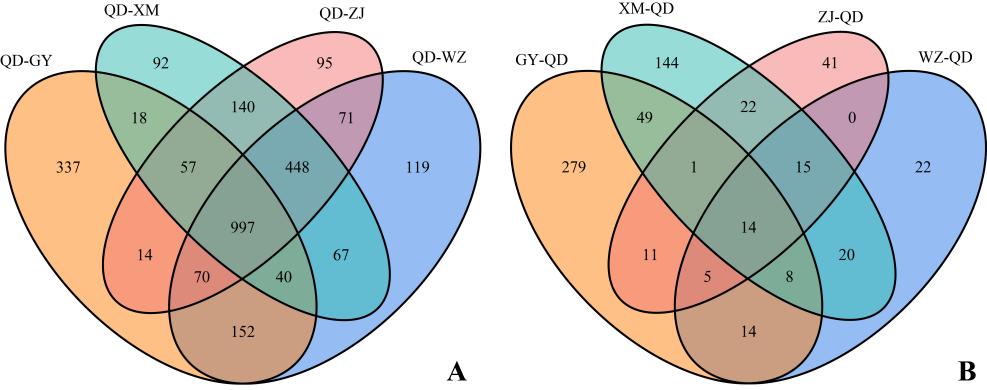


**Fig. S3** (**A**) Overlapping northern populations adaptation genes in QD/GY, QD/WZ, QD/XM and QD/ZJ pairs based on the Venn diagram; (**B**) Overlapping southern populations adaptation genes in GY/QD, WZ/QD, XM/QD and ZJ/QD pairs based on the Venn diagram


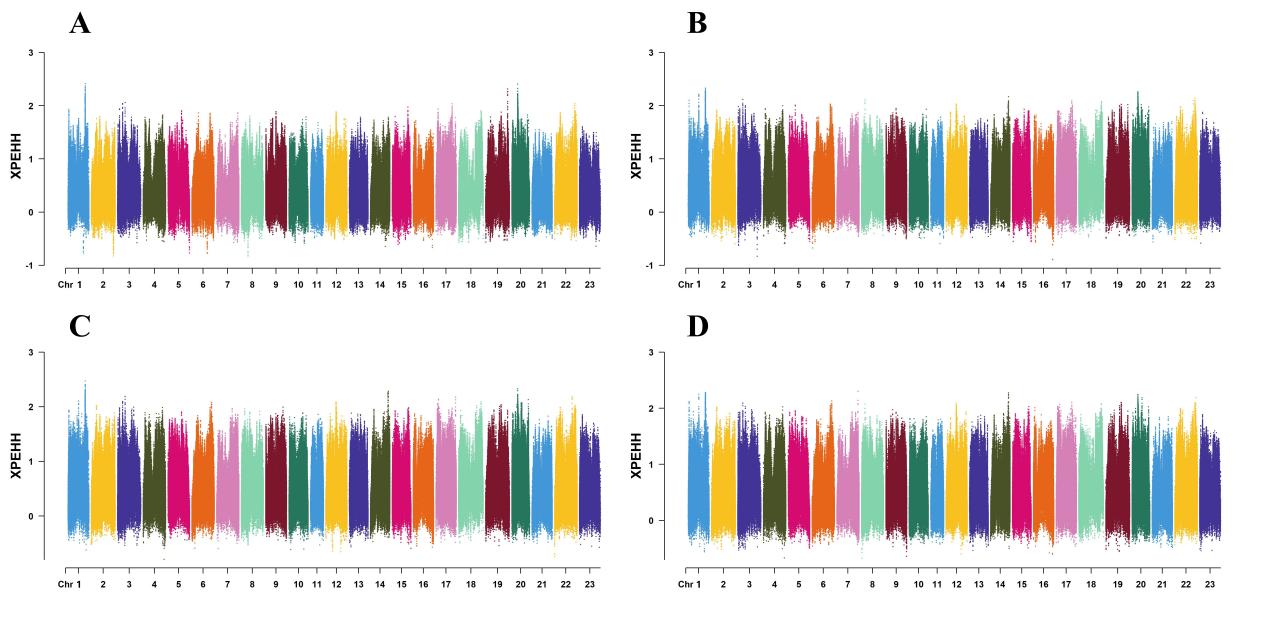


**Fig. S4** (**A**) XP-EHH analysis between the QD and GY populations; (**B**). XP-EHH analysis between the QD and WZ populations; (**C**) XP-EHH analysis between the QD and XM populations; (**D**). XP-EHH analysis between the QD and ZJ populations


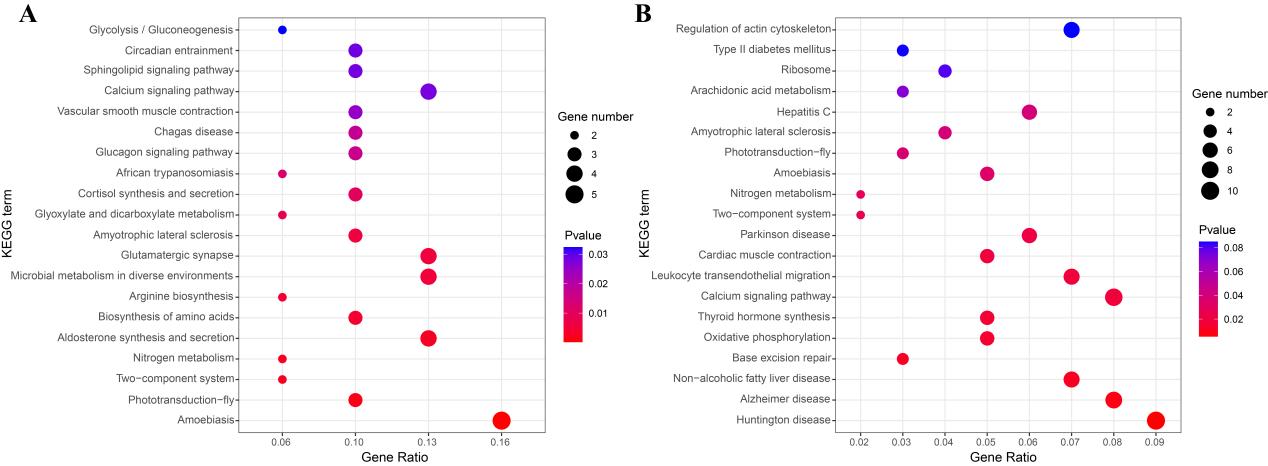


**Fig. S5** (**A**) KEGG enrichment for the selected genes based on XP-EHH values between the QD and GY populations; (**B**) KEGG enrichment for the selected genes based on XP-EHH values between the QD and XM populations
